# Supplementary material
Source: publisher site journal article supplement (https://www.dovepress.com/article/393240)
Supplement: Supplementary file 1 [file get_supplementary_file.php]

# Challenges and motivators to organ donation: A qualitative exploratory study in Gujarat, India

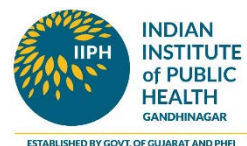

## Appendix: (Semi-structure guide for challenges and motivators to organ donation in Gujarat, India)

| <b>Section-I (Basic information)</b>     |                                             |                                                                                                                                                                                                                                                                                                                                           |
|------------------------------------------|---------------------------------------------|-------------------------------------------------------------------------------------------------------------------------------------------------------------------------------------------------------------------------------------------------------------------------------------------------------------------------------------------|
| 1.                                       | Date of Interview                           |                                                                                                                                                                                                                                                                                                                                           |
| 2.                                       | Name of participant                         |                                                                                                                                                                                                                                                                                                                                           |
| 3.                                       | Relation with the donor                     |                                                                                                                                                                                                                                                                                                                                           |
| 4.                                       | Age of the participant (In completed years) |                                                                                                                                                                                                                                                                                                                                           |
| 5.                                       | Gender of participant                       |                                                                                                                                                                                                                                                                                                                                           |
| 6.                                       | Education of participant                    | <ol style="list-style-type: none"> <li>1. Illiterate</li> <li>2. Didn't go to school but can read and write</li> <li>3. Primary - Standard 1st to 5th</li> <li>4. Secondary - Standard 6th to 10th</li> <li>5. Higher Secondary - Standard 11th to 12th</li> <li>6. Diploma/Certificate course</li> <li>7. Bachelors or higher</li> </ol> |
| 7.                                       | Occupation of Participant                   | <ol style="list-style-type: none"> <li>1. Self-employed</li> <li>2. Government job</li> <li>3. Private Job</li> <li>4. Housewife</li> <li>5. Student</li> <li>6. Not working</li> </ol>                                                                                                                                                   |
| 8.                                       | Caste                                       |                                                                                                                                                                                                                                                                                                                                           |
| 9.                                       | BPL status                                  | <ol style="list-style-type: none"> <li>1. BPL</li> <li>2. APL</li> </ol>                                                                                                                                                                                                                                                                  |
| <b>Section-II (Information of Donor)</b> |                                             |                                                                                                                                                                                                                                                                                                                                           |
| 3.                                       | Name of donor                               |                                                                                                                                                                                                                                                                                                                                           |
| 4.                                       | Age of donor (In completed years)           |                                                                                                                                                                                                                                                                                                                                           |
| 5.                                       | Gender of donor                             |                                                                                                                                                                                                                                                                                                                                           |

|     |                                                     |                                                                                                                                                                                                                                                     |
|-----|-----------------------------------------------------|-----------------------------------------------------------------------------------------------------------------------------------------------------------------------------------------------------------------------------------------------------|
| 6.  | Marital Status of donor                             | 1. Married (If not married go to 12)<br>2. Divorcee<br>3. Lives Separate<br>4. Widowed<br>5. Unmarried                                                                                                                                              |
| 7.  | Family details if married (no. of son and daughter) | Son      Daughter<br><input type="text"/> <input type="text"/> <input type="text"/> <input type="text"/>                                                                                                                                            |
| 8.  | Education of donor                                  | 1. Illiterate<br>2. Didn't go to school but can read and write<br>3. Primary - Standard 1st to 5th<br>4. Secondary - Standard 6th to 10th<br>5. Higher Secondary - Standard 11th to 12th<br>6. Diploma/Certificate course<br>7. Bachelors or higher |
| 9.  | Occupation of donor                                 | 1. Self-employed<br>2. Government job<br>3. Private Job<br>4. Housewife<br>5. Student<br>6. Not working                                                                                                                                             |
| 10. | Organ Donated                                       | 1. Liver<br>2. Kidney<br>3. Eye<br>4. Any Others (Specify) _____                                                                                                                                                                                    |
| 11. | Date of transplant (approx., month and year)        | <input type="text"/> <input type="text"/> <input type="text"/> <input type="text"/> <input type="text"/> <input type="text"/>                                                                                                                       |

**Section-III (Interview guide)**

1. Can you share the sequence of events? (What happened to him/her, cause of death, care-seeking pathways)
2. Can you share the process you followed for organ transplantation? (What are the legal procedures to be followed, who decided for organ donation, counselling received if any)
3. What were the facilitator and obstacles for deciding on organ transplantation?
4. What were the major hurdles during the transplantation process, and how do you feel about it?
5. How do you feel about organ transplantation? Would you like to share any message for the community?
6. Any suggestion to improve the process of donation.

*End of the document*
